# Supplementary material for: Decomposition of sediment-oil-agglomerates in a Gulf of Mexico sandy beach
Source: PubMed Central journal article supplement (PMC6624294; doi:10.1038/s41598-019-46301-w), 2019-07-11
Supplement: 41598_2019_46301_MOESM1_ESM.pdf [file 41598_2019_46301_MOESM1_ESM.pdf]

## Supporting Information

Decomposition of sediment-oil-agglomerates in a Gulf of Mexico sandy beach

Ioana Bociu, Boryoung Shin, Wm. Brian Wells, Joel E. Kostka, Konstantinos T. Konstantinidis, Markus Huettel\*

\*Corresponding author: Markus Huettel, [mhuettel@fsu.edu](mailto:mhuettel@fsu.edu), (850) 645-1394

|                                     | Pages    |
|-------------------------------------|----------|
| Supporting text for methods section | S2 – S4  |
| Supporting Figures S1-S7            | S5 – S8  |
| Supporting Tables S1–S6             | S9 – S13 |

## Supporting text

**Fluorescence measurement method.** The fluorescence of the surface of each sSOA was measured with a fluorometer (Waltz™) that allowed attachment of a fiber optic cable for solid-surface fluorescence determination. For the measurement, the sSOA was placed in a light-tight jar with opaque black walls. A hole in the lid of the jar allowed insertion of the fiber-optic cable. A black velvet sheet covering the jar and inserted fiber-optic cable blocked any light penetration into the jar. A collar attached to the end of the fiber-optic cable ensured that all fluorescence measurements used the same distance between the cable tip and the sSOA. A reference sample of the homogenized material used to produce the sSOAs and kept frozen between measurements was measured before and after each sample measurement. A calibration line generated by measuring the fluorescence of known mixtures of the reference material and clean sand (0-100% by weight) was produced, allowing expression of the results as percent of the initial sSOA material fluorescence remaining at the sampling time of the sSOA.

**sSOA petroleum hydrocarbon extraction.** To the bottom of each of 6 extraction flow-through cells, 3 g of pre-combusted sodium sulfate (450°C for 4.5 hours) was added for moisture removal. Then, 12 g of pre-combusted silica gel (250°C for 4.5 hours) was filled in each column for removal of organic contaminants (in-cell clean-up). The homogenized sSOA aliquot, mixed with 1 g of sodium sulfate, was added to the top of the silica gel. Finally, another 3 g of pre-combusted sodium sulfate were applied to cover the sSOA mixture. Each filled flow-through cell was spiked with 160 µL (1000 mg kg<sup>-1</sup>) of

surrogate standard. Then mass spectrometer grade methylene chloride (DCM) was cycled through the flow-through cells twice at a pressure of 140 bar and a temperature of 100°C. The solvent was heated for 1 minute, then held for 5 minutes in the cell, and afterwards discharged from the cell over a 3-minute time period. The cells then were flushed with solvent for 1 minute, followed by flushing with N<sub>2</sub> gas for 3 minutes.

**GC/MS Analysis.** The injection volume into the GC/MS system was set to 1 µL. The multimode inlet temperature was kept at 280°C on pulsed splitless mode, with a 1.2 mL min<sup>-1</sup> main column gas flow, and 2 mL min<sup>-1</sup> total gas flow when including the backflush column. The GC/MS transfer line heater, source and quadrupoles were kept at a constant 300°C, 300°C and 150°C, respectively. Collision cell EPC gas flow was 1.5 mL min<sup>-1</sup> of N<sub>2</sub> and 2.25 mL min<sup>-1</sup> of He. For saturated hydrocarbon analysis, the oven ramp program started at 50°C with a 5 minute hold, continued to 320°C at 30°C min<sup>-1</sup> with a 8 minute hold, followed by a 10°C min<sup>-1</sup> ramp rate to 325°C with a 20 minute hold, and ended with a 325°C post run for 4 minutes. The oven ramp program for aromatic hydrocarbons started at 70°C with an increase to 140°C at 20°C min<sup>-1</sup> with a 4 minute hold. This was followed by a 4°C min<sup>-1</sup> ramp to 205°C, continuing at 25°C min<sup>-1</sup> from 205°C to 300°C, and at 20°C min<sup>-1</sup> to 325°C with a 22 minute hold. The program ended with a 325°C post run for 4 minutes. The electron ionization system of the mass spectrometer used an ionization energy of 70 eV delta EMV, and a peak width of 0.7 m/z. Multiple-reaction-monitoring (MRM) methods were utilized for the quantitative evaluation of the mass spectrometer data of saturated and aromatic hydrocarbons.

**Oxygen measurements in sSOAs.** Two methods were used to install the oxygen fiber sensor in the center of the sSOAs. 1) Two sSOAs (not previously buried or aged) were placed on weighing dishes. A stainless steel needle then was used to produce a narrow vertical hole (1 mm diameter) from the surface to the center of the sSOAs using a micromanipulator. Afterwards, a calibrated oxygen fiber optode (Pyroscience™, 430 μm fiber diameter) was vertically inserted into the hole with the micromanipulator, such that the sensing tip of the sensor was positioned in the center of the sSOAs. The sSOA was slightly compressed to seal the fiber in the sSOA and the location where the fiber entered the sSOA was sealed with SOA material and a drop of mineral oil. 2) A sSOA (not previously buried or aged), contained in a stainless steel teaball, was cut in half where the halves of the teaball meet, and teaball/sSOA halves were separated such that their cross-sections were horizontal. An 8 mm long piece of silicone tubing (0.8 mm inner diameter, 2.3 mm outer diameter) was horizontally embedded in the center of the cross section of one of the two sSOA half-spheres. An oxygen fiber optode (Pyroscience™, 430 μm fiber diameter) was inserted with a micromanipulator into the tubing such that the sensing tip was located in the center. A permeable cotton plug closed in the open end of the tubing. The second half of the sSOA then was pressed firmly onto the first sSOA half. Because the sSOA material was relatively soft (similar consistency as play-doh™), this procedure sealed the fiber and silicone tubing in the sSOA. The location, where the fiber entered the sSOA additionally was sealed with a drop of mineral oil. The oxygen concentrations in the center of the three sSOAs were measured with a Pyroscience™ FireStingO2 oxygen meter connected to a HP-laptop computer.

## Supporting Figures

Figure S1. Location of the study site (yellow circle) at Pensacola Beach (30° 20' 55.8" N, 87° 02' 52.2" W), and the area affected by the Deepwater Horizon (DWH) surface oil slick (black area).

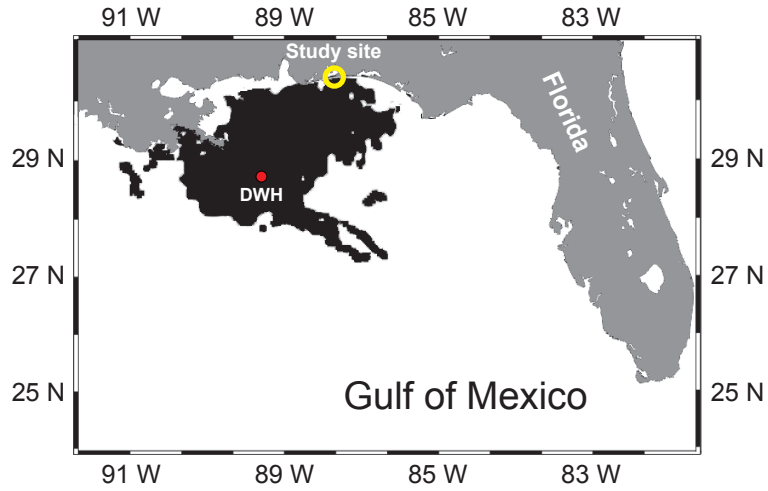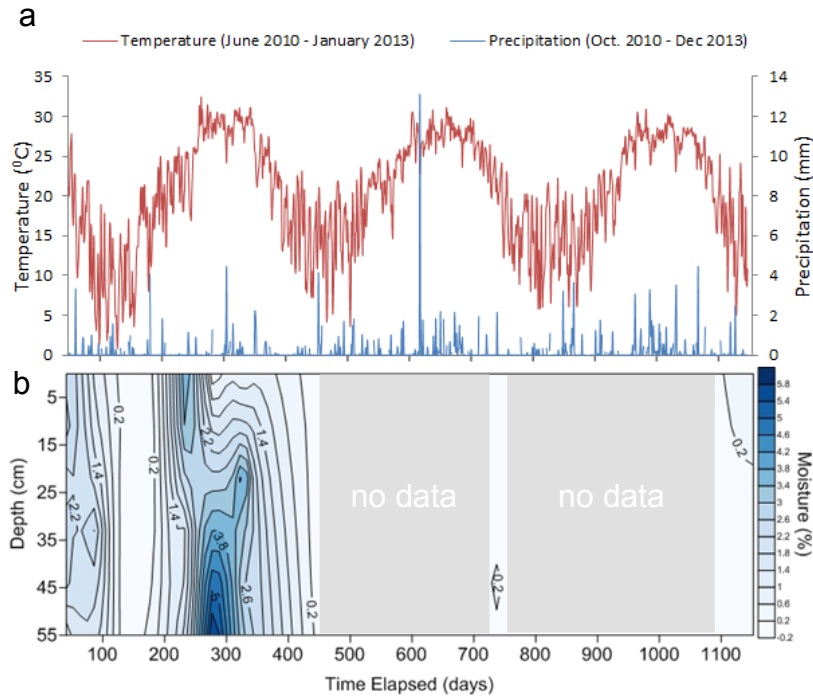

Figure S2. a: Precipitation and temperature at Pensacola Beach over the three-year experimental time period. Data are from the Florida Climate Center Downloadable Data Tool station PENSACOLA RGNL AP. b: Moisture content of sediment surrounding oil-sand agglomerates over depth, with samples for moisture analysis being removed at the same time as sSOAs. c: Sediment oxygen profile measured at the study site on 26 October 2012

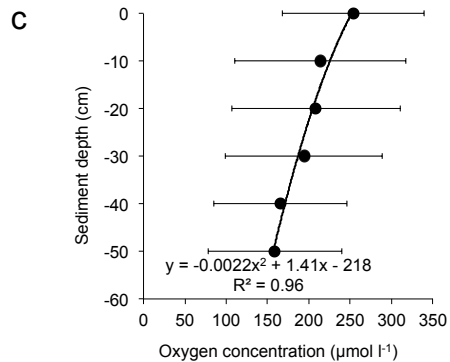

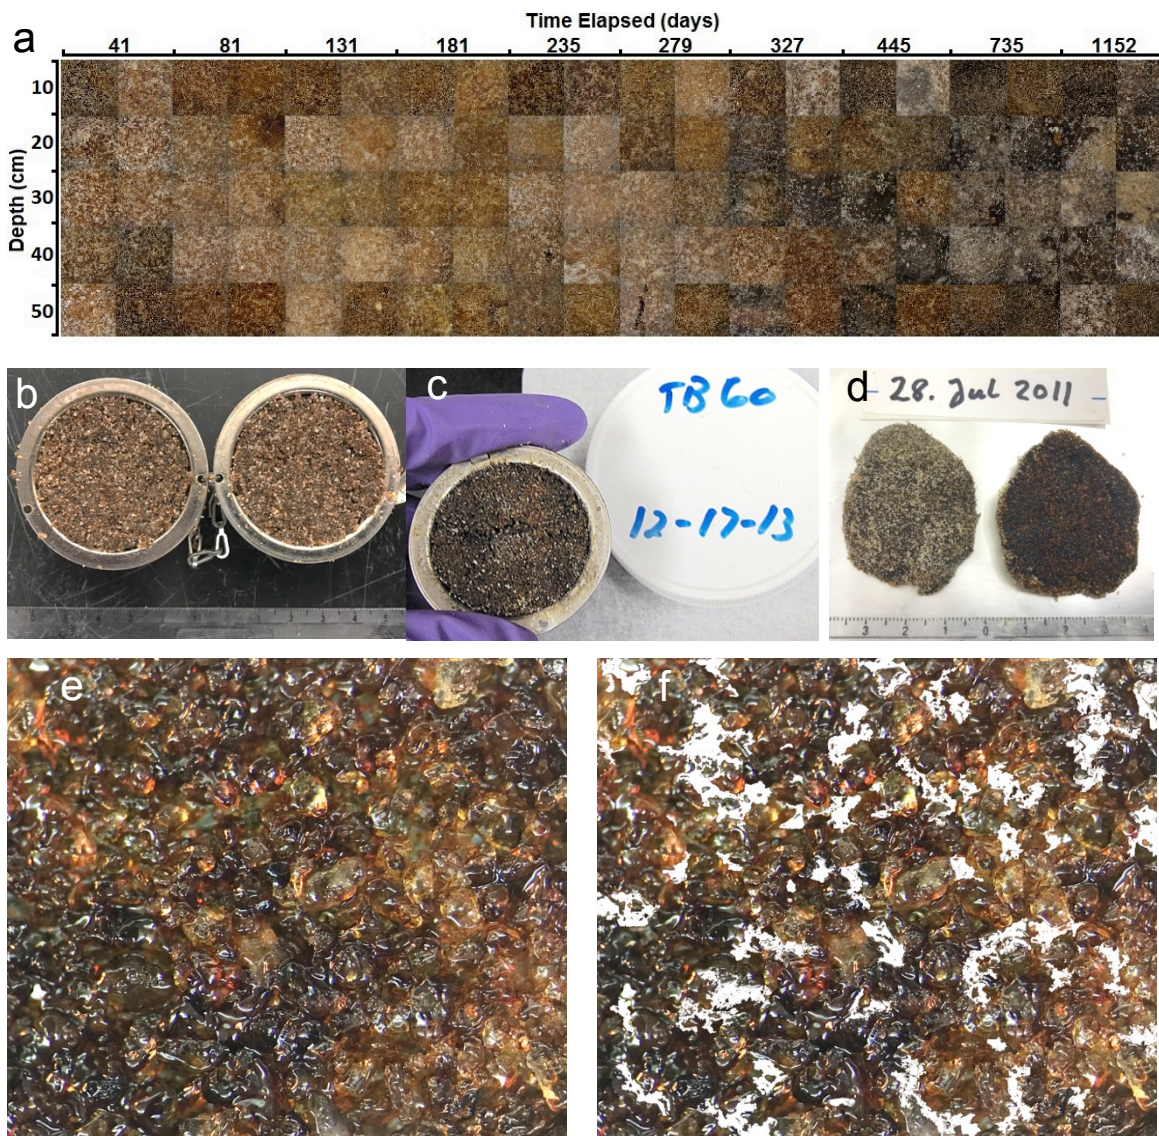

Figure S3. a: Coloration of sSOAs retrieved from the different sediment depth during the experiment. For each sampling day indicated on the X-axis, two photographs are shown, one for each of the two sSOAs buried at the depth indicated on the Y-axis. b: Cross sections of an sSOA at the beginning (10<sup>th</sup> Oct. 2010) and c: at the end of the experiment (17<sup>th</sup> Dec. 2013). d: Surface (left) and cross section (right) of an SOA collected at Pensacola Beach on 28<sup>th</sup> July 2011. e: Close-up of the cross-section shown in D. The dark color of the oiled sand results from a thin oil film coating each sand grain while larger pore spaces remain open. f: Open pore space deeper than approximately 1 grain diameter (400  $\mu\text{m}$ ) seen in E were marked white. Approximately 30% of the SOA volume is porespace filled with air (calculated from SOA volume and the weights of the sand, water and oil it contained).

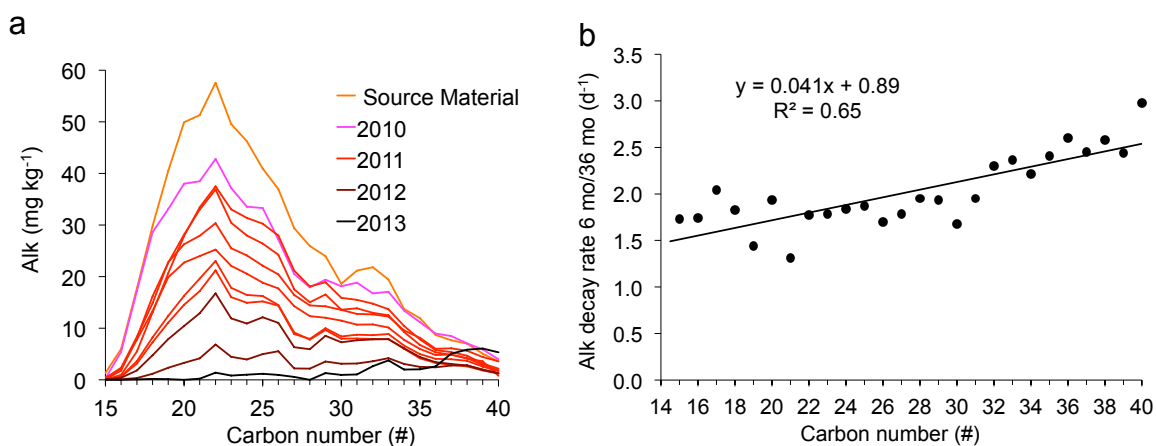

Figure S4. a: Concentrations of C15-C40 alkanes during the three years of the experiment. The concentration increases for C > 31 in 2013 are an artifact likely caused by column bleeding and not present in all samples (e.g. Fig. S6) b: Figure S6. Increase of the 0.5 year/3 year decay rate constants ratio by carbon number.

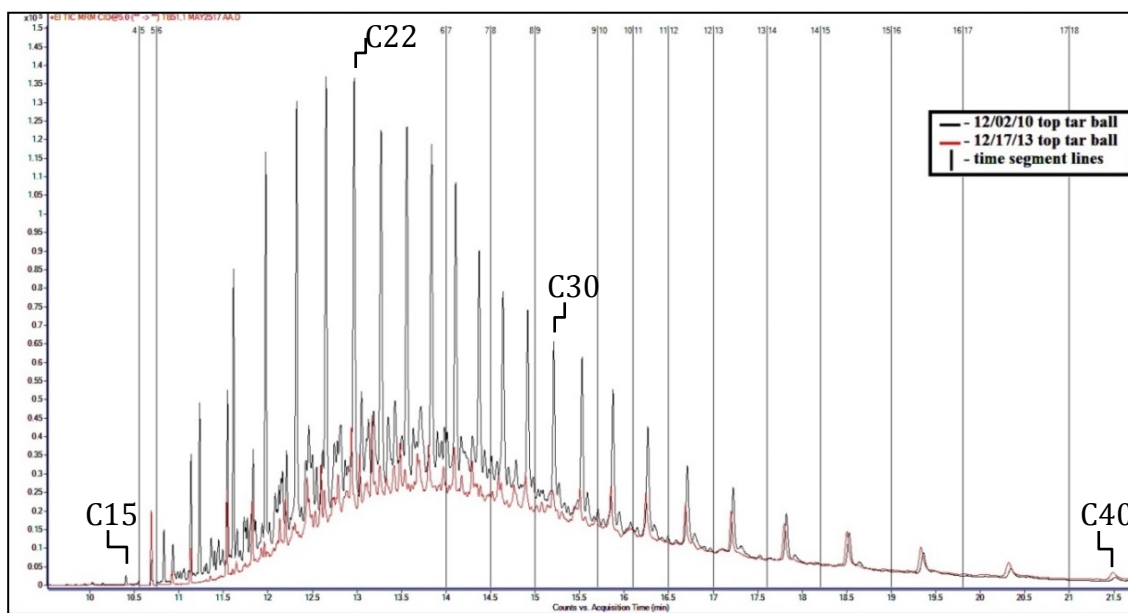

Figure S5: Chromatograph of *n*-alkanes, with carbon numbers identified (C15, C22, C30, C40). The column used is preferred for PAH's, which shows highest signal values in middle retention times. This makes the highest signal for saturated alkanes show in the middle time segment as well. The black line represents the 10 cm depth sSOA of the December 2010 array, and the red line is the 10 cm depth sSOA of the December 2013 array. The heavier saturated alkanes are less susceptible to degradation.

Figure S6. PAH decay rates versus number of C<sub>6</sub> rings. Black circles: Decay rates over the first half year. Gray circles: Decay rates over two years.

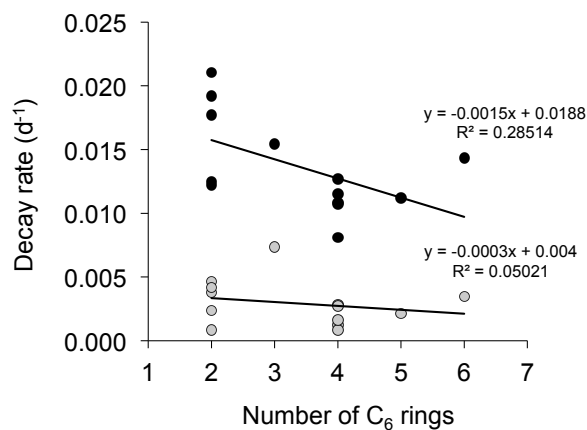

Figure S7. Partly exposed large SOA buried in Pensacola Beach sands after the Deepwater Horizon accident. This SOA was approximately 82 cm long, 42 cm wide and 25 cm thick, with a volume of 87700 cm<sup>3</sup>, or 2500 times larger than our experimental sSOAs (Photo Huettel, 30<sup>th</sup> June 2010)

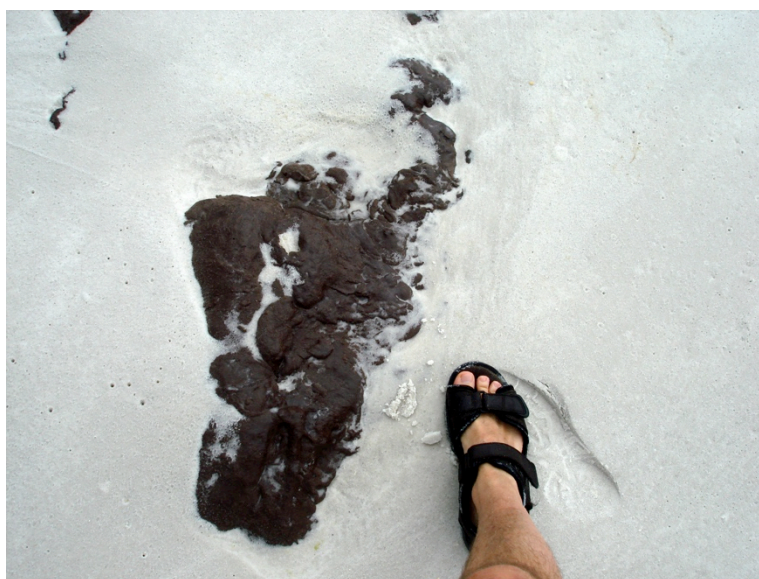



## Supporting Tables

Table S1: Alkane compounds monitored in order of elution with quantifying and qualifying ions and the internal standard used for each compound.

| Alkane Compound Elution Order |                |           |        |               |             |         |       |             |        |       |
|-------------------------------|----------------|-----------|--------|---------------|-------------|---------|-------|-------------|--------|-------|
|                               | Compound       | Type      | ISTD   | Precursor Ion | Product Ion |         |       | Product Ion |        |       |
|                               |                |           |        | Quantitative  | Qual        | CE (eV) | Dwell | Qual        | CE(eV) | Dwell |
| 1-6                           | C10-C15        | target    | ISTD-1 | 85.1          | 71.1        | 5       | 50    | 57.1        | 5      | 50    |
| 7                             | d24-hexadecane | ISTD-1    |        | 98.2          | 66.1        | 5       | 50    | 82.2        | 5      | 50    |
| 8                             | C16            | target    | ISTD-1 | 85.1          | 71.1        | 5       | 50    | 57.1        | 5      | 50    |
| 9                             | pristane       | Surrogate | ISTD-1 | 85.1          | 71.1        | 5       | 50    | 57.1        | 5      | 50    |
| 10                            | C17            | target    | ISTD-1 | 85.1          | 71.1        | 5       | 50    | 57.1        | 5      | 50    |
| 11                            | phytane        | Surrogate | ISTD-1 | 85.1          | 71.1        | 5       | 50    | 57.1        | 5      | 50    |
| 12-34                         | C18-C40        | target    | ISTD-1 | 85.1          | 71.1        | 5       | 50    | 57.1        | 5      | 50    |

Table S2: PAH compound elution order with quantifying and qualifying ions and internal standards. Collision energy (CE) is in eV and dwell time (Dwell) is in seconds.

| PAH Compound Elution Order (EPA & IARC) |                         |           |        |              |             |         |       |             |        |       |
|-----------------------------------------|-------------------------|-----------|--------|--------------|-------------|---------|-------|-------------|--------|-------|
|                                         | Compound                | Type      | ISTD   | Precursor    | Product Ion |         |       | Product Ion |        |       |
|                                         |                         |           |        | Quantitative | Qual        | CE (eV) | Dwell | Qual        | CE(eV) | Dwell |
| 1                                       | DB-naphthalene          | ISTD-1    | ISTD-1 | 136.1        | 108         | 25      | 10    |             |        |       |
| 2                                       | Naphthalene             | target    | ISTD-1 | 128          | 127         | 20      | 10    | 102         | 20     | 10    |
| 3                                       | 2-Fluorobiphenyl        | Surrogate | ISTD-1 | 172          | 171         | 15      | 10    | 170         | 30     | 10    |
| 4                                       | Biphenyl                | target    | ISTD-1 | 154          | 153         | 15      | 10    | 152         | 30     | 10.8  |
| 5                                       | Acenaphthylene          | target    | ISTD-1 | 152          | 151         | 20      | 10    | 150         | 35     | 12.8  |
| 6                                       | 2-Bromonaphthalene      | Surrogate | ISTD-1 | 205.9        | 127         | 20      | 19.4  | 151         | 35     | 20.9  |
| 7                                       | Acenaphthene            | target    | ISTD-1 | 153          | 152         | 20      | 10    | 164         | 40     | 14.2  |
| 8                                       | Fluorene                | target    | ISTD-1 | 166          | 165         | 20      | 10    | 152         | 25     | 10    |
| 9                                       | Dibenzothiophene        | target    | ISTD-1 | 184          | 139         | 35      | 10.3  | 187         | 5      | 19.4  |
| 10                                      | DIO-phenanthrene        | ISTD-2    |        | 188.1        | 184         | 35      | 10    |             |        |       |
| 11                                      | Phenanthrene            | target    | ISTD-2 | 178          | 176         | 35      | 10    | 152         | 25     | 10    |
| 12                                      | DIO-anthracene          | Surrogate | ISTD-2 | 188.1        | 187         | 35      | 10    | 187         | 5      | 19.4  |
| 13                                      | Anthracene              | target    | ISTD-2 | 178          | 176         | 35      | 10    | 152         | 25     | 10    |
| 14                                      | Ortho-terphenyl         | Surrogate | ISTD-2 | 230          | 215         | 20      | 10    | 229         | 15     | 10    |
| 15                                      | Fluoranthene            | target    | ISTD-2 | 202          | 200         | 40      | 10    | 201         | 25     | 10    |
| 16                                      | DIO-pyrene              | Surrogate | ISTD-3 | 212.1        | 208         | 45      | 10    | 210         | 30     | 10    |
| 17                                      | Pyrene                  | target    | ISTD-3 | 202          | 200         | 40      | 10    | 201         | 25     | 10    |
| 18                                      | Benzo(c)phenanthrene    | target    | ISTD-3 | 228          | 226         | 40      | 10    | 227         | 20     | 10    |
| 19                                      | Benzo(a)anthracene      | target    | ISTD-3 | 228          | 226         | 40      | 10    | 227         | 20     | 10    |
| 20                                      | D12-chrysene            | ISTD-3    |        | 240.1        | 236         | 40      | 10    |             |        |       |
| 21                                      | Chrysene                | target    | ISTD-3 | 228          | 226         | 35      | 10    | 227         | 20     | 10    |
| 22                                      | Benzo(b)fluoranthene    | target    | ISTD-4 | 252          | 250         | 40      | 10    | 126         | 50     | 69.3  |
| 23                                      | Benzo(k)fluoranthene    | target    | ISTD-4 | 252          | 250         | 40      | 10    | 253         | 50     | 69.3  |
| 24                                      | 7,12-dimethylbenz(a)    | target    | ISTD-3 | 256          | 241         | 45      | 10    | 239         | 45     | 10    |
| 25                                      | Benzo(j)fluoranthene    | target    | ISTD-4 | 252          | 250         | 40      | 10    | 126         | 50     | 69.3  |
| 26                                      | Benzo(e)pyrene          | target    | ISTD-4 | 252          | 250         | 40      | 10    | 251         | 40     | 10    |
| 27                                      | Benzo(a)pyrene          | target    | ISTD-4 | 252          | 250         | 20      | 13.6  | 251         | 20     | 10.6  |
| 28                                      | D12-perylene            | ISTD-4    |        | 264.1        | 260         | 40      | 10.6  |             |        |       |
| 29                                      | Perylene                | target    | ISTD-4 | 252          | 250         | 40      | 10    | 251         | 20     | 10    |
| 30                                      | 3-Methylcholanthrene    | target    | ISTD-4 | 268          | 252         | 40      | 10    | 253         | 20     | 10    |
| 31                                      | Indeno(1,2,3-c,d)pyrene | target    | ISTD-4 | 276          | 274         | 45      | 10    | 275         | 30     | 10    |
| 32                                      | Dibenzo(a,h)anthracene  | target    | ISTD-4 | 278          | 276         | 40      | 10    | 277         | 20     | 14.8  |
| 33                                      | Benzo(g,h,i)perylene    | target    | ISTD-4 | 276          | 274         | 50      | 17.5  | 138         | 50     | 17.5  |
| 34                                      | Dibenzo(a,i)pyrene      | target    | ISTD-4 | 302          | 150         | 40      | 10    | 300         | 40     | 56.1  |
| 35                                      | Dibenzo(a,i)pyrene      | target    | ISTD-4 | 302          | 151         | 40      | 10    | 300         | 40     | 56.1  |
| 36                                      | Dibenzo(a,h)pyrene      | target    | ISTD-4 | 302          | 151         | 40      | 10    | 300         | 40     | 56.1  |

Table S3. Concentrations of *n*-alkanes measured during the experiment. The sample for day 279, 40 cm depth was lost.

| Day after start | Depth (cm) | (mg kg <sup>-1</sup> ) |     |     |     |     |     |     |     |     |     |     |     |     |     |     |     |     |     |     |     |     |     |     |     |     |     | Sum |    |
|-----------------|------------|------------------------|-----|-----|-----|-----|-----|-----|-----|-----|-----|-----|-----|-----|-----|-----|-----|-----|-----|-----|-----|-----|-----|-----|-----|-----|-----|-----|----|
|                 |            | C15                    | C16 | C17 | C18 | C19 | C20 | C21 | C22 | C23 | C24 | C25 | C26 | C27 | C28 | C29 | C30 | C31 | C32 | C33 | C34 | C35 | C36 | C37 | C38 | C39 | C40 |     |    |
| 0               | 0          | 1                      | 6   | 18  | 30  | 40  | 50  | 51  | 58  | 50  | 46  | 41  | 37  | 29  | 26  | 24  | 19  | 21  | 22  | 19  | 14  | 12  | 9   | 8   | 7   | 5   | 4   | 646 |    |
| 41              | 10         | 0                      | 4   | 12  | 22  | 27  | 34  | 34  | 38  | 35  | 31  | 30  | 25  | 19  | 17  | 17  | 16  | 17  | 14  | 13  | 11  | 8   | 7   | 6   | 5   | 4   | 3   | 447 |    |
| 41              | 20         | 0                      | 4   | 14  | 26  | 31  | 37  | 39  | 44  | 39  | 34  | 34  | 28  | 21  | 17  | 19  | 19  | 19  | 17  | 16  | 13  | 11  | 9   | 8   | 7   | 5   | 3   | 515 |    |
| 41              | 30         | 0                      | 7   | 22  | 35  | 39  | 44  | 44  | 48  | 41  | 37  | 37  | 30  | 23  | 20  | 21  | 20  | 21  | 19  | 20  | 16  | 13  | 10  | 10  | 8   | 7   | 5   | 597 |    |
| 41              | 40         | 0                      | 7   | 20  | 32  | 36  | 40  | 40  | 43  | 37  | 34  | 34  | 28  | 21  | 18  | 20  | 19  | 20  | 18  | 19  | 15  | 12  | 10  | 9   | 8   | 7   | 5   | 552 |    |
| 41              | 50         | 0                      | 5   | 18  | 29  | 32  | 35  | 36  | 41  | 34  | 32  | 31  | 25  | 19  | 17  | 19  | 17  | 18  | 17  | 18  | 14  | 12  | 9   | 8   | 7   | 6   | 4   | 503 |    |
| 89              | 10         | 0                      | 3   | 9   | 16  | 22  | 26  | 26  | 28  | 25  | 23  | 21  | 20  | 16  | 14  | 14  | 13  | 12  | 12  | 12  | 9   | 8   | 6   | 6   | 4   | 4   | 2   | 350 |    |
| 89              | 20         | 0                      | 2   | 8   | 14  | 20  | 23  | 25  | 25  | 23  | 21  | 19  | 19  | 15  | 13  | 12  | 12  | 12  | 11  | 10  | 8   | 7   | 5   | 5   | 4   | 4   | 0   | 317 |    |
| 89              | 30         | 0                      | 2   | 7   | 13  | 20  | 23  | 24  | 26  | 22  | 21  | 19  | 18  | 14  | 12  | 12  | 11  | 10  | 11  | 10  | 8   | 4   | 5   | 5   | 4   | 3   | 1   | 305 |    |
| 89              | 40         | 0                      | 2   | 7   | 12  | 18  | 21  | 22  | 23  | 21  | 19  | 17  | 16  | 13  | 11  | 11  | 10  | 9   | 9   | 9   | 6   | 5   | 4   | 4   | 4   | 3   | 0   | 276 |    |
| 89              | 50         | 0                      | 2   | 7   | 13  | 19  | 22  | 23  | 25  | 21  | 20  | 18  | 17  | 13  | 12  | 11  | 10  | 11  | 10  | 10  | 8   | 6   | 4   | 5   | 4   | 3   | 0   | 293 |    |
| 131             | 10         | 0                      | 2   | 8   | 15  | 24  | 28  | 30  | 32  | 27  | 26  | 24  | 22  | 17  | 15  | 15  | 15  | 13  | 12  | 12  | 10  | 9   | 6   | 6   | 6   | 5   | 4   | 386 |    |
| 131             | 20         | 0                      | 3   | 9   | 17  | 25  | 28  | 29  | 30  | 27  | 26  | 24  | 22  | 18  | 16  | 16  | 14  | 15  | 15  | 13  | 11  | 9   | 7   | 7   | 6   | 5   | 4   | 396 |    |
| 131             | 30         | 0                      | 2   | 8   | 14  | 22  | 26  | 27  | 31  | 25  | 23  | 22  | 20  | 16  | 14  | 14  | 13  | 13  | 12  | 12  | 9   | 8   | 6   | 6   | 6   | 4   | 4   | 361 |    |
| 131             | 40         | 0                      | 2   | 8   | 14  | 22  | 25  | 27  | 29  | 24  | 23  | 21  | 20  | 16  | 14  | 13  | 13  | 11  | 12  | 12  | 9   | 8   | 6   | 6   | 5   | 4   | 3   | 347 |    |
| 131             | 50         | 0                      | 2   | 8   | 13  | 21  | 24  | 26  | 29  | 24  | 22  | 20  | 18  | 15  | 13  | 13  | 12  | 11  | 12  | 12  | 9   | 7   | 5   | 6   | 5   | 4   | 3   | 336 |    |
| 181             | 10         | 0                      | 1   | 7   | 16  | 23  | 29  | 34  | 39  | 30  | 28  | 27  | 25  | 17  | 14  | 17  | 14  | 14  | 13  | 12  | 9   | 7   | 5   | 4   | 3   | 2   | 1   | 391 |    |
| 181             | 20         | 0                      | 1   | 6   | 13  | 18  | 23  | 27  | 31  | 24  | 22  | 22  | 20  | 13  | 12  | 14  | 11  | 12  | 11  | 11  | 9   | 6   | 5   | 5   | 4   | 3   | 2   | 325 |    |
| 181             | 30         | 0                      | 0   | 1   | 4   | 8   | 11  | 13  | 19  | 13  | 13  | 14  | 13  | 8   | 8   | 10  | 9   | 9   | 9   | 9   | 7   | 6   | 4   | 4   | 3   | 2   | 2   | 199 |    |
| 181             | 40         | 0                      | 0   | 0   | 0   | 0   | 0   | 1   | 3   | 1   | 0   | 2   | 3   | 0   | 0   | 1   | 1   | 1   | 2   | 3   | 1   | 1   | 2   | 3   | 4   | 3   | 2   | 36  |    |
| 181             | 50         | 0                      | 0   | 1   | 3   | 6   | 9   | 11  | 15  | 11  | 11  | 12  | 11  | 6   | 6   | 8   | 8   | 8   | 8   | 8   | 9   | 7   | 5   | 4   | 4   | 3   | 2   | 173 |    |
| 235             | 10         | 0                      | 3   | 11  | 21  | 28  | 34  | 41  | 44  | 37  | 34  | 31  | 29  | 22  | 19  | 20  | 16  | 17  | 15  | 14  | 11  | 8   | 6   | 6   | 5   | 3   | 2   | 475 |    |
| 235             | 20         | 0                      | 2   | 9   | 17  | 24  | 30  | 34  | 37  | 32  | 29  | 28  | 25  | 19  | 16  | 17  | 14  | 15  | 14  | 13  | 10  | 7   | 6   | 5   | 5   | 3   | 2   | 414 |    |
| 235             | 30         | 0                      | 2   | 7   | 15  | 21  | 26  | 29  | 33  | 28  | 26  | 24  | 22  | 17  | 14  | 15  | 13  | 13  | 12  | 12  | 9   | 6   | 5   | 4   | 4   | 3   | 2   | 360 |    |
| 235             | 40         | 0                      | 1   | 7   | 16  | 23  | 29  | 34  | 39  | 30  | 28  | 27  | 25  | 17  | 14  | 17  | 14  | 14  | 13  | 12  | 9   | 7   | 5   | 4   | 3   | 2   | 1   | 391 |    |
| 235             | 50         | 0                      | 1   | 6   | 13  | 18  | 23  | 27  | 31  | 24  | 22  | 22  | 20  | 13  | 12  | 14  | 11  | 12  | 11  | 11  | 9   | 6   | 5   | 5   | 4   | 3   | 2   | 325 |    |
| 279             | 10         | 0                      | 1   | 6   | 14  | 23  | 31  | 37  | 40  | 36  | 35  | 34  | 31  | 24  | 20  | 21  | 18  | 17  | 16  | 15  | 11  | 8   | 6   | 6   | 5   | 3   | 2   | 462 |    |
| 279             | 20         | 0                      | 1   | 6   | 13  | 20  | 27  | 33  | 38  | 33  | 32  | 30  | 28  | 22  | 18  | 19  | 16  | 16  | 15  | 14  | 11  | 8   | 6   | 6   | 5   | 3   | 2   | 423 |    |
| 279             | 30         | 0                      | 1   | 4   | 11  | 17  | 24  | 30  | 35  | 31  | 30  | 28  | 26  | 20  | 17  | 17  | 15  | 14  | 14  | 12  | 10  | 8   | 5   | 5   | 4   | 3   | 2   | 385 |    |
| 279             | 40         | n/a                    | n/a | n/a | n/a | n/a | n/a | n/a | n/a | n/a | n/a | n/a | n/a | n/a | n/a | n/a | n/a | n/a | n/a | n/a | n/a | n/a | n/a | n/a | n/a | n/a | n/a | n/a |    |
| 279             | 50         | 0                      | 1   | 6   | 14  | 22  | 29  | 33  | 37  | 32  | 29  | 28  | 26  | 20  | 17  | 18  | 15  | 15  | 14  | 13  | 10  | 7   | 6   | 5   | 5   | 3   | 2   | 408 |    |
| 327             | 10         | 0                      | 1   | 6   | 12  | 17  | 22  | 27  | 30  | 23  | 21  | 20  | 18  | 12  | 10  | 12  | 10  | 10  | 9   | 9   | 7   | 4   | 3   | 3   | 3   | 2   | 1   | 293 |    |
| 327             | 20         | 0                      | 1   | 4   | 9   | 14  | 18  | 22  | 25  | 20  | 18  | 18  | 16  | 10  | 9   | 10  | 8   | 9   | 8   | 8   | 6   | 4   | 3   | 3   | 3   | 2   | 1   | 248 |    |
| 327             | 30         | 0                      | 0   | 2   | 4   | 6   | 8   | 9   | 13  | 9   | 8   | 9   | 8   | 4   | 4   | 6   | 4   | 5   | 6   | 7   | 5   | 4   | 3   | 3   | 2   | 2   | 1   | 131 |    |
| 327             | 40         | 0                      | 1   | 5   | 11  | 16  | 22  | 26  | 30  | 24  | 22  | 22  | 19  | 13  | 11  | 12  | 10  | 10  | 9   | 9   | 6   | 4   | 3   | 3   | 2   | 2   | 1   | 293 |    |
| 327             | 50         | 0                      | 0   | 3   | 6   | 9   | 12  | 14  | 18  | 13  | 12  | 13  | 11  | 7   | 6   | 8   | 7   | 7   | 7   | 6   | 4   | 3   | 3   | 3   | 3   | 2   | 1   | 183 |    |
| 445             | 10         | 0                      | 1   | 2   | 4   | 6   | 7   | 9   | 13  | 8   | 7   | 9   | 9   | 4   | 4   | 8   | 7   | 8   | 8   | 9   | 7   | 4   | 4   | 3   | 3   | 2   | 1   | 146 |    |
| 445             | 20         | 0                      | 0   | 2   | 6   | 10  | 13  | 17  | 19  | 15  | 14  | 14  | 13  | 8   | 7   | 9   | 8   | 8   | 8   | 8   | 7   | 5   | 3   | 3   | 3   | 2   | 1   | 203 |    |
| 445             | 30         | 0                      | 0   | 1   | 1   | 2   | 2   | 3   | 7   | 4   | 3   | 6   | 5   | 1   | 2   | 4   | 3   | 4   | 5   | 5   | 4   | 4   | 3   | 3   | 2   | 2   | 1   | 77  |    |
| 445             | 40         | 0                      | 0   | 2   | 7   | 12  | 16  | 20  | 24  | 18  | 17  | 17  | 15  | 10  | 9   | 11  | 10  | 10  | 9   | 9   | 7   | 5   | 4   | 3   | 3   | 2   | 1   | 241 |    |
| 445             | 50         | 0                      | 0   | 2   | 6   | 9   | 13  | 16  | 21  | 15  | 14  | 15  | 13  | 8   | 8   | 10  | 9   | 9   | 8   | 6   | 5   | 4   | 3   | 3   | 2   | 1   | 209 |     |    |
| 735             | 10         | 0                      | 0   | 1   | 3   | 7   | 10  | 11  | 16  | 11  | 11  | 12  | 11  | 7   | 6   | 9   | 7   | 8   | 8   | 9   | 7   | 5   | 4   | 4   | 3   | 2   | 2   | 174 |    |
| 735             | 20         | 0                      | 0   | 0   | 0   | 0   | 0   | 0   | 1   | 1   | 0   | 1   | 2   | 0   | 0   | 1   | 1   | 1   | 1   | 1   | 1   | 0   | 0   | 1   | 2   | 3   | 2   | 1   | 22 |
| 735             | 30         | 0                      | 0   | 1   | 2   | 4   | 7   | 8   | 12  | 8   | 8   | 9   | 9   | 4   | 4   | 6   | 5   | 6   | 6   | 8   | 6   | 5   | 4   | 4   | 4   | 3   | 2   | 134 |    |
| 735             | 40         | 0                      | 0   | 0   | 0   | 0   | 0   | 1   | 3   | 1   | 1   | 2   | 3   | 0   | 0   | 1   | 1   | 1   | 2   | 2   | 2   | 2   | 2   | 2   | 2   | 1   | 1   | 29  |    |
| 735             | 50         | 0                      | 0   | 0   | 0   | 0   | 0   | 1   | 2   | 1   | 0   | 1   | 3   | 0   | 0   | 1   | 1   | 0   | 1   | 1   | 1   | 1   | 1   | 1   | 2   | 2   | 1   | 22  |    |
| 115             | 10         | 0                      | 0   | 0   | 0   | 1   | 0   | 0   | 2   | 0   | 1   | 0   | 0   | 0   | 0   | 1   | 0   | 0   | 4   | 6   | 3   | 4   | 5   | 7   | 7   | 7   | 6   | 54  |    |
| 115             | 20         | 0                      | 0   | 0   | 0   | 0   | 0   | 0   | 0   | 0   | 0   | 0   | 0   | 0   | 0   | 0   | 0   | 0   | 1   | 2   | 0   | 1   | 2   | 4   | 5   | 6   | 6   | 26  |    |
| 115             | 30         | 0                      | 0   | 0   | 0   | 0   | 0   | 0   | 0   | 0   | 0   | 0   | 0   | 0   | 0   | 0   | 0   | 0   | 1   | 2   | 0   | 0   | 1   | 4   | 5   | 6   | 6   | 26  |    |
| 115             | 40         | 0                      | 0   | 0   | 0   | 0   | 0   | 0   | 0   | 0   | 0   | 0   | 0   | 0   | 0   | 0   | 0   | 0   | 1   | 2   | 1   | 1   | 1   | 3   | 4   | 4   | 3   | 20  |    |
| 115             | 50         | 0                      | 0   | 0   | 0   | 0   | 0   | 1   | 5   | 4   | 4   | 6   | 5   | 3   | 0   | 5   | 5   | 5   | 6   | 8   | 5   | 5   | 5   | 7   | 7   | 7   | 6   | 99  |    |

Table S4: Alkane decay rates for initial decay (0.5-year) and total 3-year decay are listed by carbon number (C15-C40). The ratio depicts the 182-d decay rate/1152-d decay rate ratio.

| Carbon number | Rate constants (d <sup>-1</sup> ) |                |           |                | Ratio |
|---------------|-----------------------------------|----------------|-----------|----------------|-------|
|               | 182 days                          | Standard error | 1152 days | Standard error |       |
| 15            | 0.0107                            | 0.0024         | 0.0062    | 0.0011         | 1.73  |
| 16            | 0.0121                            | 0.0027         | 0.0069    | 0.0006         | 1.74  |
| 17            | 0.0093                            | 0.0022         | 0.0046    | 0.0005         | 2.04  |
| 18            | 0.0078                            | 0.0018         | 0.0042    | 0.0004         | 1.83  |
| 19            | 0.0066                            | 0.0015         | 0.0046    | 0.0004         | 1.44  |
| 20            | 0.0063                            | 0.0013         | 0.0033    | 0.0004         | 1.94  |
| 21            | 0.0056                            | 0.0012         | 0.0042    | 0.0004         | 1.31  |
| 22            | 0.0052                            | 0.0012         | 0.0029    | 0.0003         | 1.78  |
| 23            | 0.0058                            | 0.0012         | 0.0033    | 0.0004         | 1.79  |
| 24            | 0.0058                            | 0.0012         | 0.0031    | 0.0004         | 1.84  |
| 25            | 0.0053                            | 0.0013         | 0.0028    | 0.0004         | 1.87  |
| 26            | 0.0048                            | 0.0011         | 0.0028    | 0.0004         | 1.70  |
| 27            | 0.0058                            | 0.0012         | 0.0033    | 0.0004         | 1.78  |
| 28            | 0.0058                            | 0.0012         | 0.0030    | 0.0004         | 1.95  |
| 29            | 0.0046                            | 0.0011         | 0.0024    | 0.0004         | 1.94  |
| 30            | 0.0042                            | 0.0015         | 0.0025    | 0.0004         | 1.68  |
| 31            | 0.0048                            | 0.0014         | 0.0025    | 0.0003         | 1.95  |
| 32            | 0.0047                            | 0.0011         | 0.0020    | 0.0003         | 2.30  |
| 33            | 0.0042                            | 0.0012         | 0.0018    | 0.0003         | 2.36  |
| 34            | 0.0040                            | 0.0014         | 0.0018    | 0.0003         | 2.22  |
| 35            | 0.0046                            | 0.0016         | 0.0019    | 0.0003         | 2.41  |
| 36            | 0.0043                            | 0.0016         | 0.0017    | 0.0003         | 2.60  |
| 37            | 0.0037                            | 0.0017         | 0.0015    | 0.0003         | 2.45  |
| 38            | 0.0034                            | 0.0016         | 0.0013    | 0.0003         | 2.58  |
| 39            | 0.0037                            | 0.0020         | 0.0015    | 0.0004         | 2.44  |
| 40            | 0.0036                            | 0.0051         | 0.0012    | 0.0007         | 2.98  |

Table S5. Concentrations of PAHs measured during the experiment. PAHs not listed were below the detection limit.

| Day after start | Depth (cm) | biphenyl               | acenaphthylene | acenaphthene | fluorene | dibenzothiophene | phenanthrene | pyrene | benzo(c)phenanthrene | chrysene | 7,12-dimethylbenz(a)anthracene | benzo(b,j,k)fluoranthene | benzo(a)pyrene | benzo(g,h,i)perylene | Sum  |
|-----------------|------------|------------------------|----------------|--------------|----------|------------------|--------------|--------|----------------------|----------|--------------------------------|--------------------------|----------------|----------------------|------|
|                 |            | (µg kg <sup>-1</sup> ) |                |              |          |                  |              |        |                      |          |                                |                          |                |                      |      |
| 0               | 0          | 36                     | 9              | 1            | 90       | 305              | 255          | 529    | 184                  | 845      | 725                            | 718                      | 102            | 129                  | 1476 |
| 41              | 10         | 86                     | 6              | 23           | 33       | 196              | 237          | 356    | 143                  | 518      | 484                            | 434                      | 687            | 94                   | 7961 |
| 41              | 20         | 160                    | 16             | 57           | 77       | 485              | 604          | 669    | 209                  | 812      | 813                            | 851                      | 117            | 194                  | 1343 |
| 41              | 30         | 35                     | 9              | 30           | 41       | 289              | 414          | 556    | 184                  | 709      | 636                            | 716                      | 100            | 151                  | 1116 |
| 41              | 40         | 53                     | 11             | 44           | 58       | 369              | 478          | 576    | 205                  | 772      | 707                            | 802                      | 107            | 167                  | 1226 |
| 41              | 50         | 64                     | 12             | 51           | 59       | 417              | 542          | 640    | 203                  | 755      | 714                            | 780                      | 106            | 152                  | 1224 |
| 89              | 10         | 13                     | 3              | 13           | 26       | 102              | 847          | 182    | 68                   | 285      | 233                            | 284                      | 351            | 35                   | 5016 |
| 89              | 20         | 8                      | 3              | 12           | 24       | 87               | 712          | 174    | 63                   | 254      | 245                            | 247                      | 312            | 32                   | 4461 |
| 89              | 30         | 13                     | 2              | 9            | 16       | 71               | 637          | 171    | 59                   | 259      | 203                            | 251                      | 311            | 31                   | 4367 |
| 89              | 40         | 13                     | 2              | 7            | 13       | 62               | 516          | 152    | 52                   | 230      | 175                            | 210                      | 271            | 26                   | 3802 |
| 89              | 50         | 11                     | 3              | 10           | 15       | 71               | 576          | 141    | 58                   | 252      | 237                            | 241                      | 300            | 27                   | 4212 |
| 131             | 10         | 14                     | 5              | 12           | 25       | 110              | 921          | 232    | 74                   | 331      | 249                            | 301                      | 389            | 37                   | 5686 |
| 131             | 20         | 15                     | 4              | 13           | 25       | 103              | 807          | 214    | 90                   | 396      | 309                            | 364                      | 468            | 52                   | 6429 |
| 131             | 30         | 19                     | 3              | 11           | 19       | 91               | 748          | 215    | 78                   | 345      | 270                            | 308                      | 410            | 46                   | 5674 |
| 131             | 40         | 18                     | 3              | 8            | 9        | 48               | 406          | 211    | 73                   | 324      | 270                            | 296                      | 395            | 44                   | 5030 |
| 131             | 50         | 12                     | 2              | 7            | 6        | 59               | 479          | 157    | 53                   | 230      | 181                            | 318                      | 288            | 29                   | 3737 |
| 181             | 10         | 5                      | 1              | 2            | 2        | 21               | 193          | 68     | 29                   | 116      | 77                             | n/a                      | 145            | 11                   | 1723 |
| 181             | 20         | 6                      | 1              | 1            | 2        | 8                | 29           | 82     | 30                   | 122      | 82                             | n/a                      | 153            | 12                   | 1630 |
| 181             | 30         | 5                      | 1              | 1            | 2        | 8                | 13           | 60     | 22                   | 982      | 56                             | n/a                      | 119            | 9                    | 1278 |
| 181             | 40         | 6                      | 1              | 2            | 2        | 15               | 63           | 66     | 26                   | 109      | 66                             | n/a                      | 132            | 11                   | 1485 |
| 181             | 50         | 4                      | 1              | 1            | 2        | 8                | 27           | 57     | 27                   | 104      | 64                             | n/a                      | 124            | 8                    | 1368 |
| 235             | 10         | 37                     | 5              | 14           | 20       | 137              | 610          | 394    | 147                  | 465      | 261                            | 337                      | 436            | 27                   | 7079 |
| 235             | 20         | 35                     | 5              | 12           | 18       | 140              | 659          | 364    | 129                  | 393      | 244                            | 287                      | 371            | 24                   | 6225 |
| 235             | 30         | 32                     | 4              | 7            | 12       | 88               | 349          | 269    | 109                  | 327      | 185                            | 237                      | 309            | 21                   | 4898 |
| 235             | 40         | 28                     | 3              | 5            | 9        | 58               | 123          | 263    | 101                  | 299      | 166                            | 194                      | 271            | 18                   | 4236 |
| 235             | 50         | 27                     | 3              | 5            | 10       | 60               | 233          | 242    | 92                   | 275      | 127                            | 168                      | 243            | 15                   | 3984 |
| 279             | 10         | 21                     | 3              | 3            | 6        | 50               | 46           | 202    | 82                   | 283      | 174                            | n/a                      | 295            | 16                   | 3732 |
| 279             | 20         | 30                     | 4              | 2            | 7        | 45               | 29           | 342    | 138                  | 449      | 268                            | n/a                      | 460            | 24                   | 5844 |
| 279             | 30         | 23                     | 3              | 3            | 7        | 36               | 14           | 301    | 115                  | 403      | 240                            | n/a                      | 392            | 18                   | 5186 |
| 279             | 40         | 22                     | 2              | 1            | 4        | 27               | 14           | 273    | 128                  | 437      | 258                            | n/a                      | 434            | 20                   | 5560 |
| 279             | 50         | 37                     | 3              | 3            | 8        | 53               | 17           | 345    | 128                  | 402      | 240                            | 317                      | 374            | 22                   | 5521 |
| 327             | 10         | 12                     | 2              | 4            | 6        | 38               | 171          | 169    | 69                   | 194      | 86                             | 109                      | 166            | 9                    | 2783 |
| 327             | 20         | 10                     | 1              | 1            | 3        | 22               | 5            | 133    | 59                   | 162      | 73                             | 86                       | 137            | 7                    | 2162 |
| 327             | 30         | 11                     | 1              | 1            | 3        | 27               | 33           | 165    | 62                   | 172      | 72                             | 94                       | 146            | 8                    | 2345 |
| 327             | 40         | 10                     | 1              | 1            | 3        | 20               | 6            | 138    | 60                   | 169      | 79                             | 94                       | 145            | 9                    | 2256 |
| 327             | 50         | 9                      | 1              | 1            | 3        | 22               | 8            | 141    | 60                   | 172      | 84                             | 97                       | 150            | 9                    | 2312 |
| 445             | 10         | 13                     | 1              | 1            | 4        | 27               | 10           | 159    | 68                   | 182      | 86                             | 107                      | 168            | 9                    | 2479 |
| 445             | 20         | 13                     | 2              | 1            | 3        | 21               | 4            | 144    | 60                   | 165      | 77                             | 85                       | 143            | 8                    | 2216 |
| 445             | 30         | 14                     | 1              | 0            | 3        | 16               | 6            | 113    | 51                   | 146      | 56                             | 56                       | 130            | 6                    | 1912 |
| 445             | 40         | 15                     | 1              | 1            | 3        | 20               | 5            | 130    | 61                   | 170      | 73                             | 95                       | 151            | 8                    | 2265 |
| 445             | 50         | 15                     | 2              | 1            | 3        | 21               | 8            | 160    | 70                   | 202      | 80                             | 109                      | 199            | 12                   | 2701 |
| 735             | 10         | 27                     | 2              | 1            | 3        | 22               | 18           | 176    | 77                   | 211      | 92                             | 127                      | 198            | 12                   | 2869 |
| 735             | 20         | 23                     | 1              | 1            | 3        | 14               | 23           | 143    | 79                   | 217      | 70                             | 99                       | 229            | 14                   | 2873 |
| 735             | 30         | 19                     | 2              | 2            | 6        | 24               | 24           | 210    | 95                   | 267      | 134                            | 176                      | 262            | 16                   | 3647 |
| 735             | 40         | 15                     | 1              | 1            | 3        | 15               | 6            | 133    | 53                   | 142      | 57                             | 77                       | 125            | 7                    | 1915 |
| 735             | 50         | 14                     | 1              | 1            | 3        | 13               | 7            | 156    | 64                   | 169      | 69                             | 86                       | 148            | 8                    | 2264 |
| 115             | 10         | 37                     | 4              | 0            | 6        | 8                | 23           | 406    | 183                  | 605      | 664                            | 664                      | 957            | 130                  | 9137 |
| 115             | 20         | 58                     | 3              | 0            | 5        | 0                | 1            | 207    | 124                  | 396      | 247                            | 332                      | 776            | 99                   | 5816 |
| 115             | 30         | 39                     | 2              | 0            | 7        | 0                | 3            | 221    | 165                  | 525      | 454                            | 382                      | 101            | 122                  | 7666 |
| 115             | 40         | 38                     | 0              | 0            | 4        | 1                | 1            | 273    | 139                  | 511      | 496                            | 499                      | 818            | 86                   | 4916 |
| 115             | 50         | 11                     | 0              | 0            | 1        | 1                | 0            | 204    | 106                  | n/a      | 381                            | 356                      | 557            | 52                   | 1669 |

Table S6: PAH decay rates for initial decay (0.5-year) and total 3-year decay are listed by carbon number (C15-C40). The ratio depicts the 182-d decay rate/1152-d decay rate ratio.

| Compound                       | Number of rings | 182 days (d <sup>-1</sup> ) | Standard error | 1152 days (d <sup>-1</sup> ) | Standard error | Ratio |
|--------------------------------|-----------------|-----------------------------|----------------|------------------------------|----------------|-------|
| biphenyl                       | 2               | 0.0122                      | 0.0024         | 0.0008                       | 0.0006         | 14.8  |
| acenaphthylene                 | 3               | 0.0125                      | 0.0020         | 0.0024                       | 0.0009         | 5.3   |
| acenaphthene                   | 3               | 0.0210                      | 0.0026         | 0.0046                       | 0.0011         | 4.5   |
| fluorene                       | 3               | 0.0192                      | 0.0024         | 0.0042                       | 0.0011         | 4.6   |
| dibenzothiopene                | 3               | 0.0177                      | 0.0024         | 0.0038                       | 0.0007         | 4.7   |
| phenanthrene                   | 3               | 0.0154                      | 0.0043         | 0.0073                       | 0.0014         | 2.1   |
| pyrene                         | 4               | 0.0115                      | 0.0013         | 0.0012                       | 0.0008         | 9.3   |
| benzo(c)phenanthrene           | 4               | 0.0107                      | 0.0015         | 0.0008                       | 0.0008         | 12.9  |
| chrysene                       | 4               | 0.0109                      | 0.0023         | 0.0016                       | 0.0007         | 6.8   |
| 7,12-dimethylbenz(a)anthracene | 4               | 0.0127                      | 0.0038         | 0.0028                       | 0.0010         | 4.5   |
| benzo(b,j,k)fluoranthene       | 5               | 0.0081                      | 0.0121         | 0.0027                       | 0.0038         | 3.0   |
| benzo(a)pyrene                 | 5               | 0.0112                      | 0.0042         | 0.0021                       | 0.0010         | 5.2   |
| benzo(g,h,i)perylene           | 6               | 0.0143                      | 0.0064         | 0.0035                       | 0.0014         | 4.1   |
